# Supplementary material for: CDK5 Knockdown inhibits proliferation and induces apoptosis and Cell Cycle Arrest in Human Glioblastoma
Source: PubMed Central journal article supplement (PMC8176241; doi:10.7150/jca.53981), 2021-05-10
Supplement: jcav12p3958s1.pdf [file jcav12p3958s1.pdf]

**Table S1. Glioma patients' characteristics in TCGA and GSE16011.**

| Clinical characteristics        |                       | TCGA             |                | GSE16011          |                |
|---------------------------------|-----------------------|------------------|----------------|-------------------|----------------|
|                                 |                       | No. of patients  | Percentage (%) | No. of patients   | Percentage (%) |
| <b>Age (year)</b>               |                       | 9-89 (Median 52) |                | 11-81 (Median 51) |                |
| <b>Sex</b>                      | Male                  | 651              | 58.4           | 184               | 66.7           |
|                                 | Female                | 460              | 41.3           | 92                | 33.3           |
|                                 | Missing               | 3                | 0.270          | 0                 | 0              |
| <b>Vital status</b>             | Alive                 | 570              | 51.2           | 24                | 8.70           |
|                                 | Dead                  | 539              | 48.4           | 240               | 87.0           |
|                                 | Missing               | 5                | 0.450          | 12                | 4.30           |
| <b>WHO grade</b>                | G1                    |                  |                | 8                 | 2.90           |
|                                 | G2                    | 249              | 22.4           | 24                | 8.70           |
|                                 | G3                    | 265              | 23.8           | 85                | 30.8           |
|                                 | G4                    | 596              | 53.5           | 159               | 57.6           |
|                                 | Missing               | 4                | 3.60           | 0                 | 0              |
| <b>Histology</b>                | Pilocytic astrocytoma |                  |                | 8                 | 2.90           |
|                                 | Astrocytoma           | 194              | 17.4           | 29                | 10.5           |
|                                 | Oligodendroglioma     | 191              | 17.2           | 52                | 18.8           |
|                                 | Oligoastrocytoma      | 130              | 11.7           | 28                | 10.1           |
|                                 | Glioblastoma          | 596              | 53.5           | 159               | 57.6           |
|                                 | Missing               | 3                | 0.270          | 0                 | 0              |
| <b>KPS</b>                      | <80                   | 151              | 13.6           | 82                | 29.7           |
|                                 | ≥80                   | 584              | 52.4           | 183               | 66.3           |
|                                 | Missing               | 379              | 34.0           | 11                | 3.99           |
| <b>Tumor status</b>             | Tumor free            | 209              | 18.8           |                   |                |
|                                 | With tumor            | 783              | 70.3           |                   |                |
|                                 | Missing               | 122              | 10.95          |                   |                |
| <b>IDH1 mutation</b>            | Yes                   | 91               | 8.17           | 83                | 30.1           |
|                                 | No                    | 34               | 3.05           | 143               | 51.8           |
|                                 | Missing               | 989              | 88.8           | 50                | 18.1           |
| <b>Family history of cancer</b> | Yes                   | 132              | 11.9           |                   |                |
|                                 | No                    | 210              | 18.85          |                   |                |

---

|                  |                        |     |       |
|------------------|------------------------|-----|-------|
|                  | Missing                | 772 | 69.30 |
| <b>Ethnicity</b> | Hispanic or Latino     | 45  | 4.04  |
|                  | Not Hispanic or Latino | 939 | 84.29 |
|                  | Missing                | 130 | 11.67 |

---
